# Supplementary material for: In situ synthesis of g-C3N4/WO3 heterojunction plates array films with enhanced photoelectrochemical performance
Source: Royal Society of Chemistry journal article supplement (doi:10.1039/c5ra11464k), 2015-01-01
Supplement: c5ra11464k1.pdf [file c5ra11464k1.pdf]

Figure S1

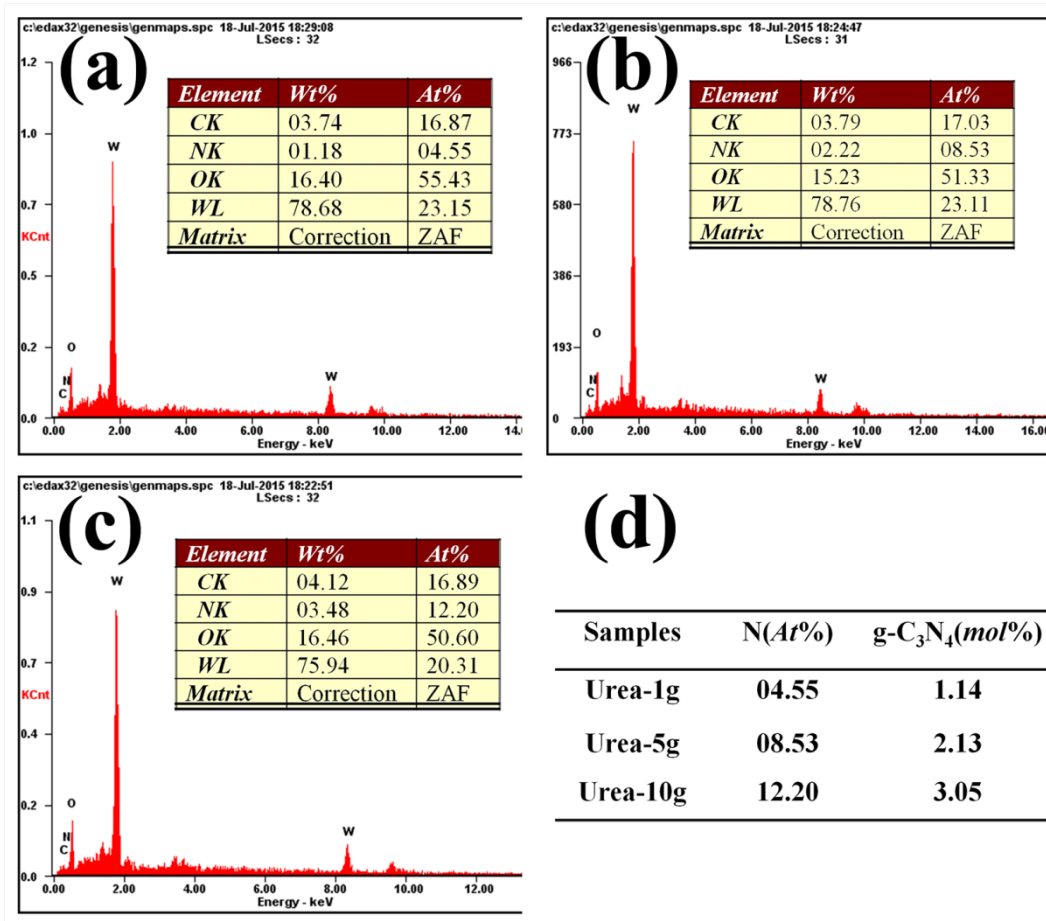

Fig.S1 The EDS analysis of g-C<sub>3</sub>N<sub>4</sub>/WO<sub>3</sub> films prepared with different weight of urea-1g (a), 5g (b), and 10g (c), and the corresponding g-C<sub>3</sub>N<sub>4</sub> content (d).
